# Supplementary material for: New constraints on biological production and mixing processes in theSouth China Sea from triple isotope composition of dissolved oxygen
Source: Copernicus journal article supplement (doi:10.5194/bg-2020-448), 2021-01-15
Supplement: Supplementary file 1 [file Supplement 23Nov20.xlsx]

## Sheet: Table 1
	Supplement to Jurikova et al. "New constraints on biological production and mixing processes in the South China Sea from triple isotope composition of dissolved oxygen"
	Table 1. Triple oxygen isotope and oxygen-argon composition of analysed samples from South China Sea.
	Sampling date	Depth	δ17O	δ18O	17Δ	Δ(O2/Ar)
		(m)	(‰, vs. air)	(‰, vs. air)	(per meg)	(%, vs. air)
	October 16th, 2013	5	-0.0568861	-0.242196	68.5851	-
	October 16th, 2013	10	0.018966	-0.118256	80.2259	-
	October 16th, 2013	30	-0.0943453	-0.417965	122.201	-
	October 16th, 2013	50	-0.514601	-1.25671	136.652	-
	October 16th, 2013	80	2.571	4.61679	181.705	-
	October 16th, 2013	100	3.4723	6.37582	174.095	-
	October 16th, 2013	150	3.75921	6.96853	154.978	-
	October 16th, 2013	200	2.50526	4.6002	124.682	-
	October 16th, 2013	300	4.12911	7.70788	143.238	-
	October 16th, 2013	400	3.98844	7.51328	103.175	-
	October 16th, 2013	500	4.20833	7.90919	118.653	-
	August 5th, 2014	5	0.0674669	0.00189016	66.4855	0.239758
	August 5th, 2014	10	0.102367	0.103814	48.5886	-0.712204
	August 5th, 2014	20	-0.0991413	-0.310574	61.756	-0.533156
	August 5th, 2014	80	2.52503	4.4751	208.918	-42.2573
	August 5th, 2014	100	3.54749	6.43598	218.06	-48.4047
	August 5th, 2014	200	4.6779	8.76612	145.933	-60.5297
	August 5th, 2014	600	3.76915	6.92568	186.927	-68.3683
	August 5th, 2014	1000	4.35562	8.00546	215.841	-71.183
	August 5th, 2014	1800	4.38368	8.15368	167.621	-68.3448
	August 5th, 2014	2500	4.30604	7.96234	188.642	-67.245
	August 5th, 2014	3500	3.17381	5.84475	150.017	-65.6578
	August 6th, 2014	5	0.183786	0.286999	35.1254	-0.031356
	August 6th, 2014	10	0.139372	0.132363	70.8023	0.00684302
	August 6th, 2014	20	0.0989969	0.0853116	54.8025	-0.429186
	August 6th, 2014	50	-0.416391	-1.07246	139.353	-4.93166
	August 6th, 2014	80	1.40612	2.36293	182.581	-33.0925
	August 6th, 2014	200	5.20907	9.67693	206.995	-57.1659
	August 6th, 2014	400	4.51882	8.35181	200.371	-63.0529
	August 6th, 2014	600	5.07589	9.37613	228.843	-71.177
	August 6th, 2014	1000	4.90596	9.12833	186.941	-72.1135
	August 6th, 2014	1200	4.76828	8.80634	215.228	-70.7209
	August 6th, 2014	1800	4.46773	8.27209	190.459	-68.8101
	August 6th, 2014	2500	4.22349	7.87653	150.541	-66.5078
	August 6th, 2014	3500	4.15736	7.74603	151.762	-65.2311
	April 24th, 2015	5	0.222211	0.35065	40.5818	1.62886
	April 24th, 2015	10	0.0937909	0.0824313	51.0889	1.3081
	April 24th, 2015	20	-0.0945244	-0.304987	63.4784	-4.51913
	April 24th, 2015	80	2.1356	3.86387	135.7	-3.60899
	April 24th, 2015	100	3.12872	5.81698	119.365	-36.0784
	April 24th, 2015	150	3.42655	6.38321	124.7	-41.1692
	April 24th, 2015	200	1.99217	3.73134	60.9529	-33.1256
	April 24th, 2015	300	4.19773	7.79573	166.416	-57.0689
	April 24th, 2015	400	3.76427	6.99285	147.509	-50.3995
	April 24th, 2015	500	4.75274	8.83084	187.185	-68.0875
	April 24th, 2015	600	4.94739	9.138	223.208	-70.4141
	April 24th, 2015	1000	4.58153	8.44342	215.74	-71.114
	April 24th, 2015	1800	4.48302	8.31785	182.177	-68.0105
	April 24th, 2015	3500	4.25194	7.8804	176.883	-65.2463
	April 25th, 2016	5	0.0836745	0.120024	21.5024	1.43841
	April 25th, 2016	10	0.116794	0.179987	23.5626	1.80174
	April 25th, 2016	20	0.159845	0.247741	31.5187	2.0185
	April 25th, 2016	30	-0.0319386	-0.194728	68.9397	2.22823
	April 25th, 2016	50	-0.417379	-1.04892	126.159	-2.01712
	April 25th, 2016	80	2.2661	4.14019	123.35	-29.3362
	April 25th, 2016	100	3.20618	5.92653	140.169	-37.1484
